# Supplementary material for: A pumpless liver-on-a-chip for drug hepatotoxicity analysis
Source: Royal Society of Chemistry journal article supplement (doi:10.1039/d4an00602j), 2024-01-01

Fig. S1 Structure of liver chip molds and self-made rocker

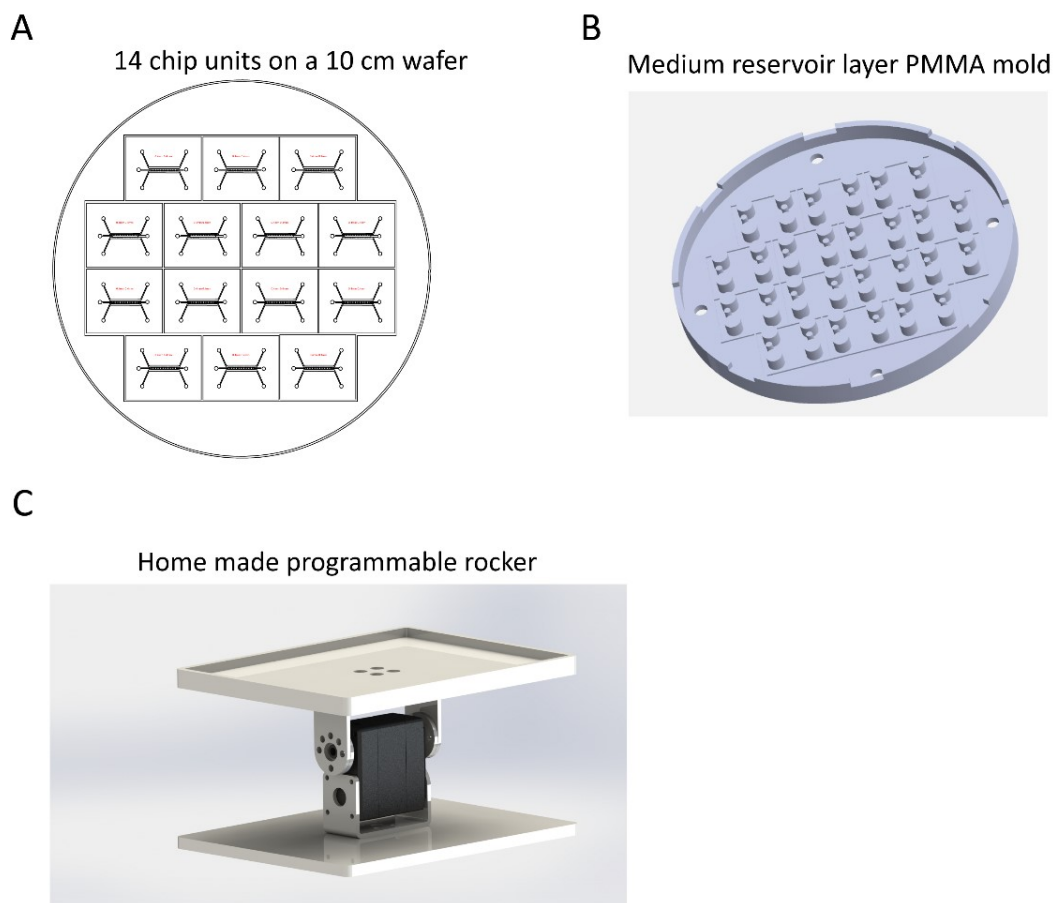

Fig. S2 CCK8 results of AA and AL on Caco2 and HK2 cell lines

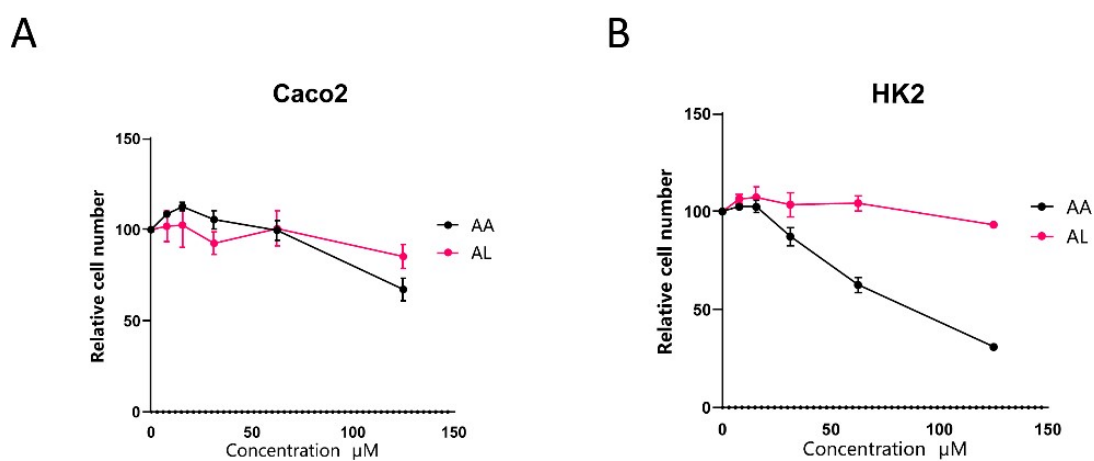

Fig. S3 Additional transcriptome data

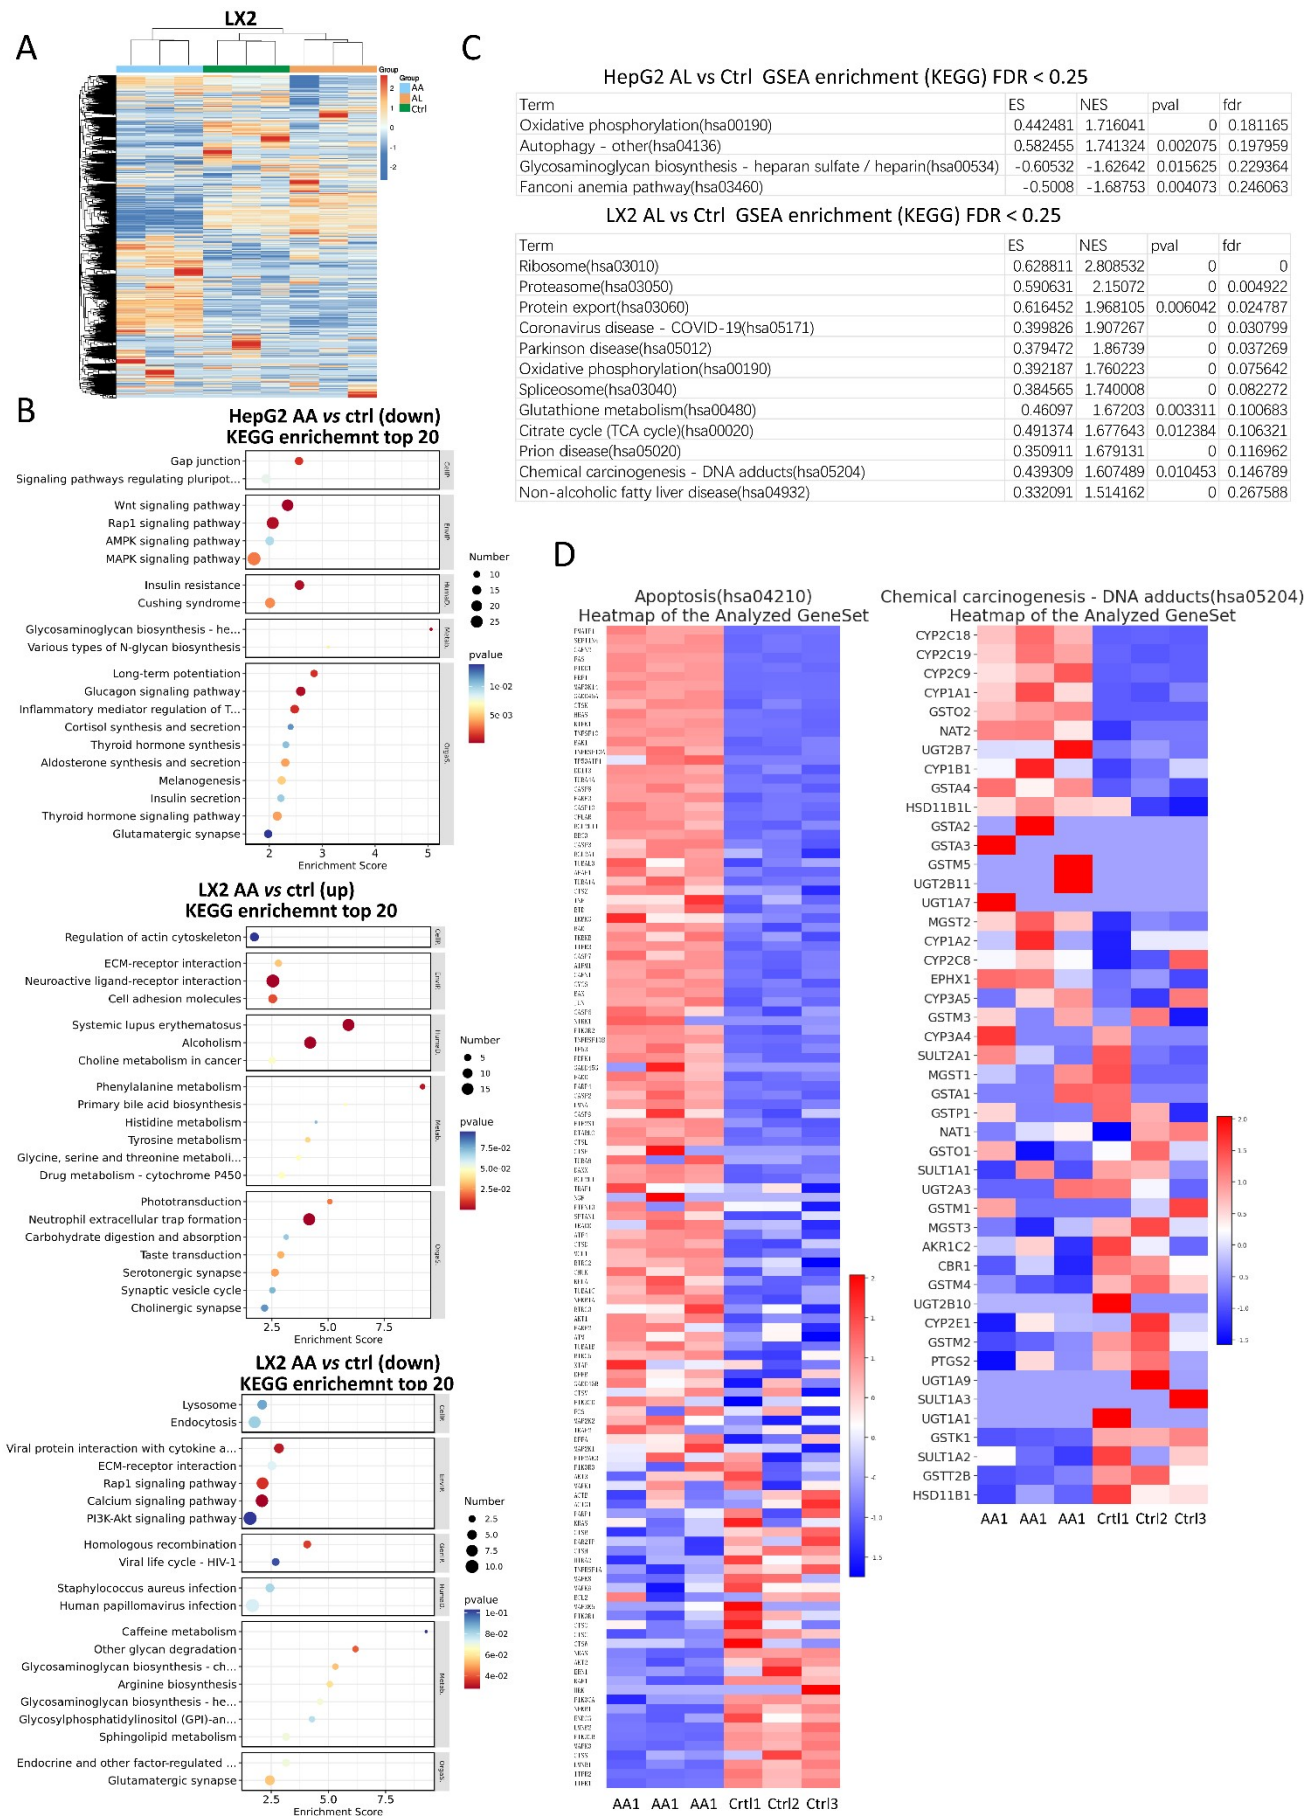

Supplement: d4an00602j2.pdf [file d4an00602j2.pdf]
